# Supplementary material
Source: publisher figshare collection journal article supplement (https://acs.figshare.com/ndownloader/files/9852577)
Supplement: Supplementary file 1 [file 9852577]

Supporting Information

**Identification of the Peptide PyroQ- $\beta$ Casein<sub>194-209</sub> as a Highly Specific and Sensitive Marker to Differentiate between Ultrahigh-Temperature Processed (UHT) Milk and Mildly Heated Milk**

*Sevim Dalabasmaz, Jennifer Ebner, Monika Pischetsrieder\**

Food Chemistry Unit, Department of Chemistry and Pharmacy, Emil Fischer Center,  
Friedrich-Alexander Universität Erlangen-Nürnberg (FAU), Nikolaus-Fiebiger-Str. 10, 91058  
Erlangen, Germany

\*Correspondence to M.P., Telephone +49-9131-8565592, E-Mail:

monika.pischetsrieder@fau.de

**Table S1. Evaluation of the Endogenous Milk Peptide  $m/z$  1589.9 as Internal Standard for the Analysis of Heated Milk Samples**

The synthesized peptide  $m/z$  1558.8 was added to the milk samples and its intensity was set as 100%. Relative quantities of the peptide  $m/z$  1589.9 in different raw (n=3), pasteurized (n=4), ESL (n=4) and UHT (n=4) milk samples were compared. Raw milk samples were heated at 99 °C for 0 min (n=3), 15 min (n=3), 30 min (n=3) and 45 min (n=3). Mean relative intensity values (RI, %) and standard deviations (SD) of the signals for peptide  $m/z$  1589.9 are shown. Different commercial milk samples, different heating durations, and different raw milk samples were compared by one-way ANOVA and Tukey's HSD multiple comparison tests (95% confidence of interval) and different letters indicate statistically significant differences.

| commercial samples |                                | heating of raw milk |                               | raw milk samples |                               |
|--------------------|--------------------------------|---------------------|-------------------------------|------------------|-------------------------------|
| type               | RI $\pm$ SD                    | heating time        | RI $\pm$ SD                   | sample           | RI $\pm$ SD                   |
| pasteurized        | 23.86 $\pm$ 5.53 <sup>a</sup>  | 0 min               | 15.08 $\pm$ 1.56 <sup>b</sup> | raw milk 1       | 15.11 $\pm$ 1.80 <sup>b</sup> |
| ESL milk           | 24.36 $\pm$ 4.60 <sup>a</sup>  | 15 min              | 15.65 $\pm$ 2.16 <sup>b</sup> | raw milk 2       | 14.57 $\pm$ 1.57 <sup>b</sup> |
| UHT milk           | 19.32 $\pm$ 2.79 <sup>ab</sup> | 30 min              | 16.89 $\pm$ 2.19 <sup>b</sup> | raw milk 3       | 17.50 $\pm$ 1.96 <sup>b</sup> |
|                    |                                | 45 min              | 16.18 $\pm$ 0.57 <sup>b</sup> |                  |                               |

**Table S2. Relative Quantification of the Detected Peptides in Mildly Heated and UHT Milk Samples of the Training Set Using the Peptide *m/z* 1589.9 as Internal Standard**

Commercially available mildly heated [pasteurized (n=20), microfiltered-ESL (n=13), heated-ESL (n=16)] and UHT (n=29) milk samples from different manufacturers were analyzed in triplicate. Mean relative intensities (RI, %) and standard deviations of the peptides are shown. All peptides of the recorded peptide profile were quantified and peptides, in which the intensities in all mildly heated groups were statistically different compared to the UHT group, are displayed. Different types of milk samples were compared by one-way ANOVA and Tukey's HSD multiple comparison tests (95% confidence of interval) and different letters indicate statistically significant differences between types of milk samples.

| <b>higher RI in mildly heated samples</b> |            |                             |                              |                              |                            |
|-------------------------------------------|------------|-----------------------------|------------------------------|------------------------------|----------------------------|
| No                                        | <i>m/z</i> | mildly heated               |                              |                              | UHT                        |
|                                           |            | pasteurized                 | microfiltered-<br>ESL        | heated-ESL                   |                            |
| 1                                         | 1718.0     | 32.53 ± 6.51 <sup>a</sup>   | 32.45 ± 8.25 <sup>a</sup>    | 24.73 ± 7.23 <sup>a</sup>    | 16.79 ± 15.19 <sup>b</sup> |
| 2                                         | 2331.3     | 217.67 ± 91.01 <sup>a</sup> | 293.78 ± 111.24 <sup>a</sup> | 208.99 ± 144.63 <sup>a</sup> | 86.44 ± 29.97 <sup>b</sup> |
| 3                                         | 2381.2     | 8.64 ± 2.82 <sup>a</sup>    | 9.11 ± 1.71 <sup>a</sup>     | 8.89 ± 3.79 <sup>a</sup>     | 6.08 ± 2.66 <sup>b</sup>   |
| 4                                         | 2437.3     | 6.71 ± 2.48 <sup>a</sup>    | 7.29 ± 2.72 <sup>a</sup>     | 6.95 ± 3.64 <sup>a</sup>     | 4.48 ± 1.73 <sup>b</sup>   |
| 5                                         | 2586.5     | 8.45 ± 3.18 <sup>a</sup>    | 9.07 ± 2.82 <sup>a</sup>     | 8.61 ± 4.26 <sup>a</sup>     | 5.45 ± 1.99 <sup>b</sup>   |
| 6                                         | 2616.5     | 120.50 ± 49.12 <sup>a</sup> | 137.34 ± 50.67 <sup>a</sup>  | 114.69 ± 76.97 <sup>a</sup>  | 14.09 ± 16.52 <sup>b</sup> |
| 7                                         | 3215.8     | 18.33 ± 9.20 <sup>a</sup>   | 23.83 ± 9.78 <sup>a</sup>    | 19.83 ± 14.01 <sup>a</sup>   | 10.09 ± 4.25 <sup>b</sup>  |
| <b>higher RI in UHT milk</b>              |            |                             |                              |                              |                            |
| No                                        | <i>m/z</i> | mildly heated               |                              |                              | UHT                        |
|                                           |            | pasteurized                 | microfiltered-<br>ESL        | heated-ESL                   |                            |
| 1                                         | 997.6      | 4.16 ± 1.92 <sup>b</sup>    | 4.26 ± 1.69 <sup>b</sup>     | 4.09 ± 1.05 <sup>b</sup>     | 14.09 ± 9.40 <sup>a</sup>  |
| 2                                         | 1001.6     | 3.07 ± 1.65 <sup>b</sup>    | 3.28 ± 2.26 <sup>b</sup>     | 3.26 ± 1.71 <sup>b</sup>     | 6.31 ± 4.22 <sup>a</sup>   |
| 3                                         | 1012.7     | 5.88 ± 2.41 <sup>b</sup>    | 5.22 ± 3.65 <sup>b</sup>     | 4.98 ± 2.80 <sup>b</sup>     | 10.00 ± 6.38 <sup>a</sup>  |
| 4                                         | 1092.6     | 3.64 ± 1.85 <sup>b</sup>    | 4.54 ± 2.90 <sup>b</sup>     | 6.63 ± 3.61 <sup>b</sup>     | 98.41 ± 95.99 <sup>a</sup> |

|           |        |                             |                             |                              |                              |
|-----------|--------|-----------------------------|-----------------------------|------------------------------|------------------------------|
| <b>5</b>  | 1094.7 | 3.41 ± 1.59 <sup>b</sup>    | 3.32 ± 1.41 <sup>b</sup>    | 4.58 ± 2.02 <sup>b</sup>     | 38.36 ± 24.54 <sup>a</sup>   |
| <b>6</b>  | 1108.6 | 2.14 ± 1.51 <sup>b</sup>    | 2.34 ± 1.28 <sup>b</sup>    | 2.61 ± 1.08 <sup>b</sup>     | 20.67 ± 17.64 <sup>a</sup>   |
| <b>7</b>  | 1124.6 | 1.78 ± 1.15 <sup>b</sup>    | 2.35 ± 1.32 <sup>b</sup>    | 1.95 ± 0.93 <sup>b</sup>     | 7.30 ± 7.27 <sup>a</sup>     |
| <b>8</b>  | 1128.6 | 4.44 ± 3.36 <sup>b</sup>    | 3.30 ± 1.21 <sup>b</sup>    | 4.43 ± 1.48 <sup>b</sup>     | 7.34 ± 4.21 <sup>a</sup>     |
| <b>9</b>  | 1130.6 | 2.98 ± 1.77 <sup>b</sup>    | 3.17 ± 1.07 <sup>b</sup>    | 3.66 ± 1.14 <sup>b</sup>     | 8.56 ± 4.30 <sup>a</sup>     |
| <b>10</b> | 1237.7 | 5.45 ± 3.19 <sup>b</sup>    | 5.02 ± 2.12 <sup>b</sup>    | 5.15 ± 2.09 <sup>b</sup>     | 7.75 ± 3.56 <sup>a</sup>     |
| <b>11</b> | 1270.7 | 4.75 ± 2.72 <sup>b</sup>    | 4.56 ± 2.25 <sup>b</sup>    | 4.19 ± 1.56 <sup>b</sup>     | 7.01 ± 2.35 <sup>a</sup>     |
| <b>12</b> | 1284.7 | 13.11 ± 10.94 <sup>b</sup>  | 13.63 ± 16.04 <sup>b</sup>  | 48.11 ± 61.53 <sup>b</sup>   | 415.80 ± 304.21 <sup>a</sup> |
| <b>13</b> | 1306.8 | 1.78 ± 1.36 <sup>b</sup>    | 1.86 ± 0.92 <sup>b</sup>    | 2.25 ± 1.03 <sup>b</sup>     | 10.06 ± 6.80 <sup>a</sup>    |
| <b>14</b> | 1422.8 | 2.43 ± 1.52 <sup>b</sup>    | 1.95 ± 1.00 <sup>b</sup>    | 2.37 ± 1.06 <sup>b</sup>     | 8.72 ± 6.85 <sup>a</sup>     |
| <b>15</b> | 1460.9 | 4.19 ± 4.07 <sup>b</sup>    | 7.11 ± 3.45 <sup>b</sup>    | 13.56 ± 14.34 <sup>b</sup>   | 111.53 ± 53.40 <sup>a</sup>  |
| <b>16</b> | 1572.0 | 2.46 ± 0.93 <sup>b</sup>    | 2.07 ± 1.37 <sup>b</sup>    | 2.05 ± 1.32 <sup>b</sup>     | 7.93 ± 3.67 <sup>a</sup>     |
| <b>17</b> | 1574.9 | 1.17 ± 0.64 <sup>b</sup>    | 1.40 ± 0.98 <sup>b</sup>    | 2.05 ± 1.22 <sup>b</sup>     | 50.84 ± 54.77 <sup>a</sup>   |
| <b>18</b> | 1592.9 | 9.72 ± 1.50 <sup>b</sup>    | 10.19 ± 1.67 <sup>b</sup>   | 11.18 ± 2.01 <sup>b</sup>    | 40.82 ± 41.98 <sup>a</sup>   |
| <b>19</b> | 1608.9 | 2.76 ± 1.10 <sup>b</sup>    | 3.61 ± 1.93 <sup>b</sup>    | 2.89 ± 0.88 <sup>b</sup>     | 20.64 ± 11.56 <sup>a</sup>   |
| <b>20</b> | 1624.9 | 2.29 ± 0.99 <sup>b</sup>    | 2.63 ± 1.21 <sup>b</sup>    | 4.24 ± 3.63 <sup>b</sup>     | 35.14 ± 18.42 <sup>a</sup>   |
| <b>21</b> | 1633.9 | 4.07 ± 1.86 <sup>b</sup>    | 3.55 ± 1.32 <sup>b</sup>    | 3.66 ± 1.49 <sup>b</sup>     | 6.19 ± 2.36 <sup>a</sup>     |
| <b>22</b> | 1668.9 | 2.53 ± 1.06 <sup>b</sup>    | 2.99 ± 1.56 <sup>b</sup>    | 2.95 ± 1.51 <sup>b</sup>     | 33.52 ± 35.17 <sup>a</sup>   |
| <b>23</b> | 1689.9 | 2.41 ± 1.54 <sup>b</sup>    | 2.74 ± 2.03 <sup>b</sup>    | 6.57 ± 3.70 <sup>b</sup>     | 82.03 ± 69.53 <sup>a</sup>   |
| <b>24</b> | 1701.0 | 3.78 ± 1.10 <sup>b</sup>    | 5.92 ± 1.67 <sup>b</sup>    | 8.28 ± 5.58 <sup>b</sup>     | 62.53 ± 41.07 <sup>a</sup>   |
| <b>25</b> | 1705.9 | 1.30 ± 0.80 <sup>b</sup>    | 1.64 ± 0.36 <sup>b</sup>    | 2.15 ± 1.11 <sup>b</sup>     | 13.29 ± 7.68 <sup>a</sup>    |
| <b>26</b> | 1712.9 | 2.45 ± 1.26 <sup>b</sup>    | 2.29 ± 1.31 <sup>b</sup>    | 2.59 ± 0.95 <sup>b</sup>     | 10.40 ± 4.54 <sup>a</sup>    |
| <b>27</b> | 1782.0 | 2.24 ± 0.89 <sup>b</sup>    | 2.18 ± 1.15 <sup>b</sup>    | 2.46 ± 1.25 <sup>b</sup>     | 15.76 ± 11.28 <sup>a</sup>   |
| <b>28</b> | 1825.0 | 2.15 ± 0.88 <sup>b</sup>    | 2.13 ± 1.20 <sup>b</sup>    | 2.07 ± 0.94 <sup>b</sup>     | 8.13 ± 4.28 <sup>a</sup>     |
| <b>29</b> | 1895.1 | 4.38 ± 1.46 <sup>b</sup>    | 4.66 ± 1.05 <sup>b</sup>    | 6.59 ± 4.59 <sup>b</sup>     | 16.76 ± 8.26 <sup>a</sup>    |
| <b>30</b> | 1905.0 | 1.68 ± 0.89 <sup>b</sup>    | 2.06 ± 0.91 <sup>b</sup>    | 2.26 ± 1.71 <sup>b</sup>     | 12.96 ± 5.07 <sup>a</sup>    |
| <b>31</b> | 1973.1 | 3.33 ± 1.40 <sup>c</sup>    | 5.13 ± 3.94 <sup>bc</sup>   | 13.14 ± 11.65 <sup>b</sup>   | 30.10 ± 11.30 <sup>a</sup>   |
| <b>32</b> | 1991.1 | 15.84 ± 5.72 <sup>b</sup>   | 15.39 ± 3.27 <sup>b</sup>   | 13.75 ± 3.95 <sup>b</sup>    | 38.02 ± 16.25 <sup>a</sup>   |
| <b>33</b> | 1994.1 | 227.71 ± 99.03 <sup>b</sup> | 326.41 ± 82.52 <sup>b</sup> | 330.25 ± 226.76 <sup>b</sup> | 766.32 ± 442.97 <sup>a</sup> |
| <b>34</b> | 2014.0 | 6.56 ± 2.58 <sup>b</sup>    | 8.78 ± 4.07 <sup>b</sup>    | 14.68 ± 6.14 <sup>b</sup>    | 75.50 ± 50.40 <sup>a</sup>   |
| <b>35</b> | 2032.1 | 3.16 ± 1.81 <sup>b</sup>    | 4.14 ± 1.61 <sup>b</sup>    | 4.36 ± 3.17 <sup>b</sup>     | 12.33 ± 6.56 <sup>a</sup>    |
| <b>36</b> | 2107.2 | 134.80 ± 56.35 <sup>b</sup> | 187.11 ± 47.99 <sup>b</sup> | 178.23 ± 89.41 <sup>b</sup>  | 297.61 ± 151.46 <sup>a</sup> |
| <b>37</b> | 2207.2 | 3.59 ± 1.30 <sup>b</sup>    | 4.21 ± 2.09 <sup>b</sup>    | 4.33 ± 1.95 <sup>b</sup>     | 13.50 ± 6.03 <sup>a</sup>    |

---

|           |        |                     |                     |                     |                      |
|-----------|--------|---------------------|---------------------|---------------------|----------------------|
| <b>38</b> | 2278.2 | $7.74 \pm 2.59^b$   | $8.01 \pm 2.06^b$   | $10.31 \pm 4.06^b$  | $14.15 \pm 5.75^a$   |
| <b>39</b> | 2454.2 | $3.15 \pm 1.35^b$   | $4.45 \pm 2.19^b$   | $4.14 \pm 1.85^b$   | $15.28 \pm 7.77^a$   |
| <b>40</b> | 2510.4 | $4.47 \pm 1.55^b$   | $4.99 \pm 2.03^b$   | $4.86 \pm 1.81^b$   | $11.91 \pm 5.08^a$   |
| <b>41</b> | 2618.3 | $39.53 \pm 19.02^b$ | $42.22 \pm 14.36^b$ | $47.63 \pm 29.31^b$ | $124.43 \pm 98.19^a$ |
| <b>42</b> | 2634.4 | $2.12 \pm 1.24^b$   | $2.18 \pm 0.82^b$   | $3.62 \pm 2.30^b$   | $11.47 \pm 6.69^a$   |
| <b>43</b> | 2696.4 | $2.16 \pm 1.33^b$   | $2.52 \pm 1.11^b$   | $3.56 \pm 2.89^b$   | $52.05 \pm 53.89^a$  |
| <b>44</b> | 2699.4 | $14.05 \pm 7.69^b$  | $11.24 \pm 3.77^b$  | $14.19 \pm 6.63^b$  | $22.23 \pm 12.00^a$  |
| <b>45</b> | 2712.5 | $3.00 \pm 1.00^b$   | $2.63 \pm 1.28^b$   | $2.62 \pm 1.66^b$   | $8.18 \pm 5.30^a$    |
| <b>46</b> | 2784.5 | $2.55 \pm 1.13^b$   | $2.82 \pm 1.21^b$   | $3.94 \pm 2.26^b$   | $10.80 \pm 5.89^a$   |
| <b>47</b> | 2795.4 | $3.91 \pm 1.70^b$   | $4.33 \pm 2.45^b$   | $4.44 \pm 1.68^b$   | $16.19 \pm 8.88^a$   |
| <b>48</b> | 2995.5 | $3.49 \pm 1.53^b$   | $3.84 \pm 1.90^b$   | $3.32 \pm 1.56^b$   | $11.67 \pm 8.42^a$   |

---

**Table S3. Relative Quantification of Peptides in Heated Raw Milk Samples Using the Peptide *m/z* 1589.9 as Internal Standard**

A raw milk sample was heated at 99 °C for 0 min, 15 min, 30 min and 45 min. Mean relative intensities (%) and standard deviations of the peptides at different time points are shown. All peptides of the recorded peptide profile were quantified and peptides showing a significant decrease or increase are displayed. Different heating times were compared by one-way ANOVA and Tukey's HSD multiple comparison tests (95% confidence of interval) and different letters indicate statistically significant differences between heating times.

| <b>peptides increasing under heat exposure</b> |                   |                            |                             |                             |                             |
|------------------------------------------------|-------------------|----------------------------|-----------------------------|-----------------------------|-----------------------------|
| <b>No</b>                                      | <b><i>m/z</i></b> | <b>0 min</b>               | <b>15 min</b>               | <b>30 min</b>               | <b>45 min</b>               |
| <b>1</b>                                       | 1092.6            | 6.75 ± 2.78 <sup>b</sup>   | 18.90 ± 5.22 <sup>b</sup>   | 55.80 ± 17.81 <sup>a</sup>  | 77.49 ± 27.35 <sup>a</sup>  |
| <b>2</b>                                       | 1094.7            | 6.65 ± 2.20 <sup>b</sup>   | 21.63 ± 5.68 <sup>b</sup>   | 55.47 ± 18.06 <sup>a</sup>  | 75.41 ± 20.89 <sup>a</sup>  |
| <b>3</b>                                       | 1108.6            | 4.83 ± 0.87 <sup>b</sup>   | 7.78 ± 2.99 <sup>b</sup>    | 12.86 ± 4.18 <sup>ab</sup>  | 24.88 ± 14.73 <sup>a</sup>  |
| <b>4</b>                                       | 1197.6            | 5.51 ± 1.13 <sup>c</sup>   | 54.36 ± 18.93 <sup>bc</sup> | 108.80 ± 42.49 <sup>a</sup> | 86.18 ± 27.59 <sup>ab</sup> |
| <b>5</b>                                       | 1460.9            | 5.02 ± 2.15 <sup>d</sup>   | 41.75 ± 3.52 <sup>c</sup>   | 120.90 ± 13.20 <sup>b</sup> | 206.42 ± 14.19 <sup>a</sup> |
| <b>6</b>                                       | 1624.9            | 5.09 ± 2.02 <sup>c</sup>   | 22.75 ± 7.71 <sup>c</sup>   | 117.42 ± 57.90 <sup>b</sup> | 178.68 ± 21.09 <sup>a</sup> |
| <b>7</b>                                       | 1689.9            | 3.80 ± 0.38 <sup>b</sup>   | 33.77 ± 11.41 <sup>b</sup>  | 103.54 ± 45.33 <sup>a</sup> | 116.86 ± 41.30 <sup>a</sup> |
| <b>8</b>                                       | 1701.0            | 4.66 ± 2.07 <sup>c</sup>   | 12.81 ± 3.70 <sup>c</sup>   | 30.27 ± 3.48 <sup>b</sup>   | 52.00 ± 8.84 <sup>a</sup>   |
| <b>9</b>                                       | 1705.9            | 4.06 ± 2.60 <sup>c</sup>   | 10.42 ± 5.01 <sup>bc</sup>  | 28.73 ± 12.11 <sup>ab</sup> | 40.30 ± 18.74 <sup>a</sup>  |
| <b>10</b>                                      | 1905.0            | 10.95 ± 3.90 <sup>c</sup>  | 9.87 ± 1.93 <sup>c</sup>    | 36.92 ± 10.24 <sup>b</sup>  | 57.08 ± 12.32 <sup>a</sup>  |
| <b>11</b>                                      | 1973.1            | 6.97 ± 2.45 <sup>c</sup>   | 85.17 ± 26.39 <sup>b</sup>  | 158.64 ± 24.09 <sup>a</sup> | 171.06 ± 35.72 <sup>a</sup> |
| <b>12</b>                                      | 1991.1            | 44.76 ± 14.12 <sup>b</sup> | 44.76 ± 15.82 <sup>b</sup>  | 85.90 ± 12.94 <sup>a</sup>  | 115.91 ± 23.06 <sup>a</sup> |
| <b>13</b>                                      | 2014.0            | 6.96 ± 2.99 <sup>c</sup>   | 44.02 ± 16.25 <sup>b</sup>  | 76.19 ± 20.29 <sup>ab</sup> | 78.01 ± 25.50 <sup>a</sup>  |
| <b>14</b>                                      | 2216.1            | 5.97 ± 0.59 <sup>c</sup>   | 24.60 ± 5.41 <sup>b</sup>   | 39.79 ± 9.77 <sup>a</sup>   | 47.46 ± 6.59 <sup>a</sup>   |

---

**peptides decreasing under heat exposure**

---

| <b>No</b> | <b><i>m/z</i></b> | <b>0 min</b>                 | <b>15 min</b>               | <b>30 min</b>                | <b>45 min</b>               |
|-----------|-------------------|------------------------------|-----------------------------|------------------------------|-----------------------------|
| <b>1</b>  | 1060.6            | 21.03 ± 6.78 <sup>a</sup>    | 14.73 ± 4.49 <sup>ab</sup>  | 12.74 ± 4.42 <sup>ab</sup>   | 10.95 ± 3.58 <sup>b</sup>   |
| <b>2</b>  | 1237.7            | 30.03 ± 10.85 <sup>a</sup>   | 9.94 ± 6.30 <sup>b</sup>    | 10.25 ± 2.99 <sup>b</sup>    | 7.74 ± 1.92 <sup>b</sup>    |
| <b>3</b>  | 1679.9            | 60.19 ± 6.42 <sup>a</sup>    | 48.97 ± 15.79 <sup>ab</sup> | 39.49 ± 9.93 <sup>b</sup>    | 33.19 ± 1.61 <sup>b</sup>   |
| <b>4</b>  | 1718.0            | 26.30 ± 3.33 <sup>a</sup>    | 11.05 ± 3.80 <sup>b</sup>   | 11.22 ± 1.41 <sup>b</sup>    | 12.11 ± 2.61 <sup>b</sup>   |
| <b>5</b>  | 1863.1            | 63.58 ± 20.95 <sup>a</sup>   | 38.29 ± 16.99 <sup>ab</sup> | 41.34 ± 12.29 <sup>ab</sup>  | 26.27 ± 5.29 <sup>b</sup>   |
| <b>6</b>  | 1881.1            | 811.03 ± 148.83 <sup>a</sup> | 9.79 ± 3.40 <sup>b</sup>    | 14.99 ± 8.45 <sup>b</sup>    | 8.99 ± 2.76 <sup>b</sup>    |
| <b>7</b>  | 2309.3            | 33.15 ± 11.12 <sup>a</sup>   | 18.16 ± 3.40 <sup>b</sup>   | 15.95 ± 1.81 <sup>b</sup>    | 14.34 ± 2.91 <sup>b</sup>   |
| <b>8</b>  | 2331.3            | 338.41 ± 100.59 <sup>a</sup> | 218.12 ± 51.54 <sup>b</sup> | 192.07 ± 55.50 <sup>b</sup>  | 149.71 ± 31.67 <sup>b</sup> |
| <b>9</b>  | 2347.3            | 62.83 ± 22.58 <sup>a</sup>   | 36.18 ± 6.97 <sup>b</sup>   | 32.76 ± 10.82 <sup>b</sup>   | 31.47 ± 10.88 <sup>b</sup>  |
| <b>10</b> | 2430.3            | 38.21 ± 11.99 <sup>a</sup>   | 21.59 ± 6.30 <sup>b</sup>   | 15.28 ± 3.54 <sup>b</sup>    | 15.55 ± 4.81 <sup>b</sup>   |
| <b>11</b> | 2460.4            | 832.97 ± 238.97 <sup>a</sup> | 389.32 ± 70.95 <sup>b</sup> | 353.04 ± 140.17 <sup>b</sup> | 291.67 ± 81.86 <sup>b</sup> |
| <b>12</b> | 2616.5            | 298.81 ± 79.53 <sup>a</sup>  | 129.48 ± 20.12 <sup>b</sup> | 123.18 ± 37.04 <sup>b</sup>  | 120.09 ± 46.25 <sup>b</sup> |
| <b>13</b> | 2763.6            | 314.39 ± 110.66 <sup>a</sup> | 86.64 ± 27.54 <sup>b</sup>  | 71.17 ± 34.23 <sup>b</sup>   | 53.18 ± 17.03 <sup>b</sup>  |
| <b>14</b> | 2827.6            | 45.67 ± 18.07 <sup>a</sup>   | 26.78 ± 7.40 <sup>ab</sup>  | 22.54 ± 8.18 <sup>b</sup>    | 20.36 ± 7.23 <sup>b</sup>   |
| <b>15</b> | 3215.8            | 30.65 ± 6.22 <sup>a</sup>    | 24.50 ± 9.62 <sup>ab</sup>  | 17.84 ± 4.60 <sup>bc</sup>   | 11.41 ± 3.52 <sup>c</sup>   |
| <b>16</b> | 3982.2            | 75.98 ± 29.69 <sup>a</sup>   | 65.13 ± 29.54 <sup>ab</sup> | 31.35 ± 11.26 <sup>bc</sup>  | 16.48 ± 6.11 <sup>c</sup>   |

---

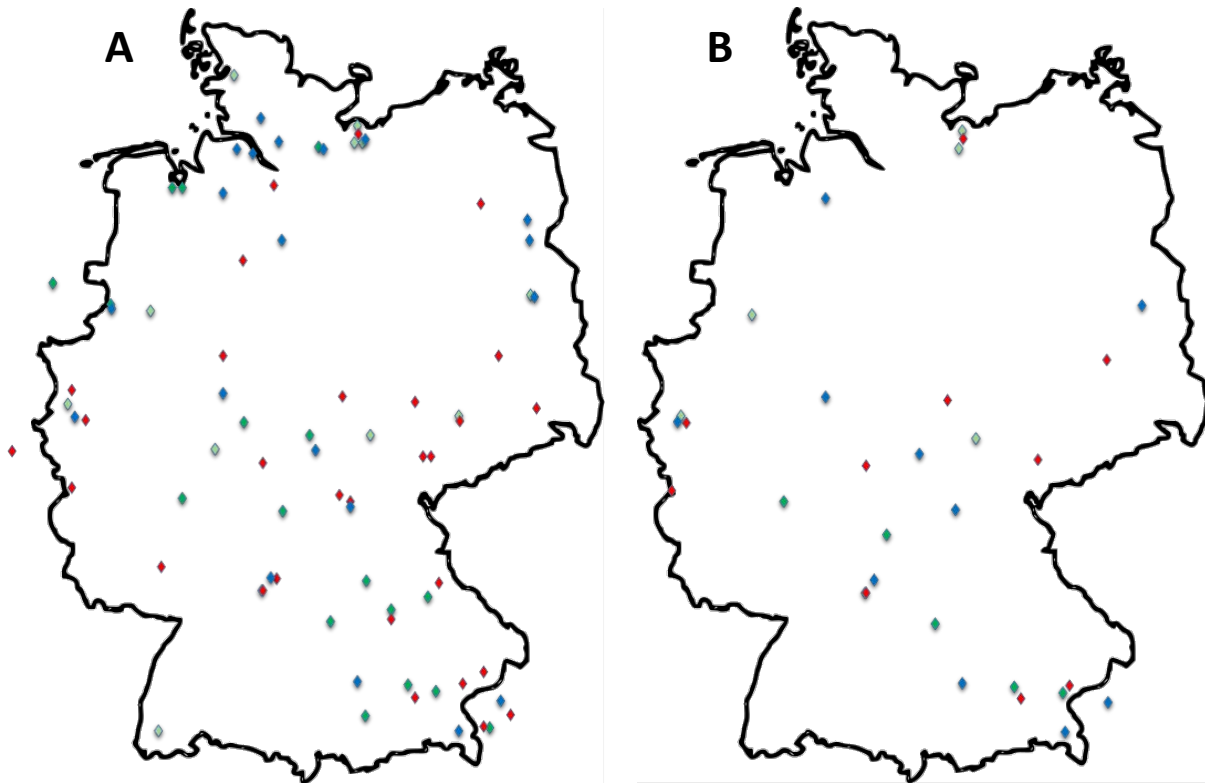

**Figure S1.** Map of the distribution of training set (A) and test set (B) samples. (A) Commercially available pasteurized (n=20, blue diamond), microfiltered-ESL (n=13, light green diamond), heated-ESL (n=16, green diamond) and UHT (n=29, red diamond) milk samples were produced by dairies mostly located in Germany (72 samples) and neighboring countries like Austria (4 samples), Belgium (1 sample) and The Netherlands (1 sample).

(B) Commercially available pasteurized (n=10, blue diamond), microfiltered-ESL (n=5, light green diamond), heated-ESL (n=5, green diamond) and UHT (n=10, red diamond) milk samples were collected from local supermarkets. The production facilities were localized by the identification marks on the milk packages.



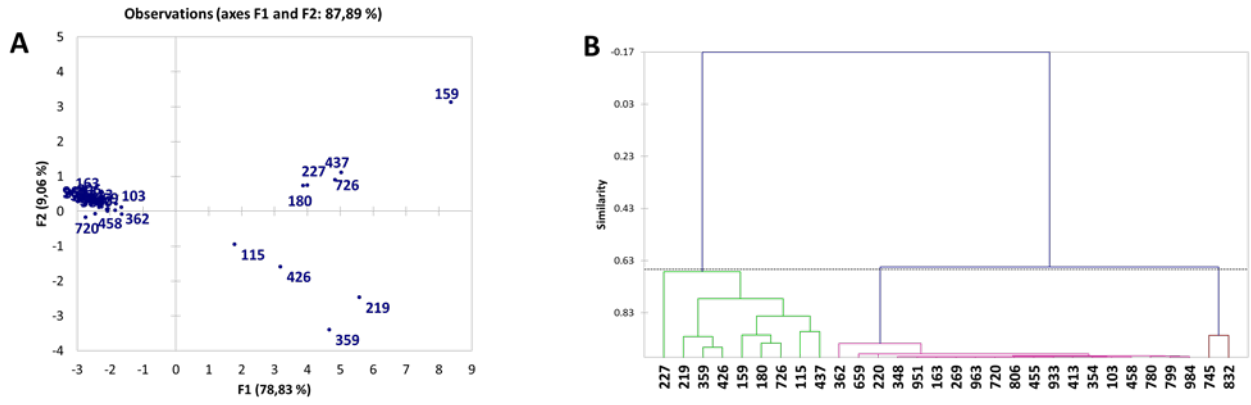

**Figure S2.** Projection of blind test set samples with multivariate statistical analysis (principal component analysis, PCA and agglomerative hierarchical clustering, AHC) (A) 2D-map visualization of 30 blinded milk samples. The negative side of the x-axis represents mildly heated samples; the positive side of the x-axis corresponds to UHT samples. (B) The similarity dendrogram of 30 blind test set samples. Each color represents a single cluster and samples with the same color share similar characteristics. Green lines represent UHT samples, while purple and brown lines represent mildly heated samples. The dotted line represents the truncation of three main clusters.
